# Supplementary material
Source: Royal Society of Chemistry journal article supplement (doi:10.1039/d6ta00083e)
Supplement: d6ta00083e1.pdf [file d6ta00083e1.pdf]

## Electronic Supplementary Information

### **Synergistic Spin-State Modulation in Co/N co-Doped TiO<sub>2</sub> for Enhanced Photoelectrocatalytic Oxygen Evolution under External Magnetic Fields**

Dibyendu Ghosh<sup>1,2</sup>, Krishnendu Roy<sup>1</sup>, Soumyajit Maitra<sup>1</sup>, and Praveen Kumar<sup>1,3,\*</sup>

<sup>1</sup>*School of Materials Science, Indian Association for the Cultivation of Science, Kolkata 700032, India.*

<sup>2</sup>*Department of Physics, Sister Nivedita University, DG 1/2 New Town, Action Area 1, Kolkata 700156*

<sup>3</sup>*Plaksha University, Sahibzada Ajit Singh Nagar, Mohali-140306, India*

*\*Corresponding Author Email: [praveen.kumar@plaksha.edu.in](mailto:praveen.kumar@plaksha.edu.in)*

## MATERIALS AND METHODS

**Materials:** Titanium isopropoxide ((Merck), Thiourea (99%, Sigma-Aldrich)), Cobalt acetate tetrahydrate (99%, Sigma-Aldrich), 2-Propanol (Merck), Acetone (Merck), Hydrazine hydrate (80%, Sigma-Aldrich), Sulfuric acid (98%, Merck).

### Synthesis Protocol:

***TiO<sub>2</sub> nanoparticle:*** In a typical synthesis procedure of TiO<sub>2</sub> nanoparticles was prepared using typical sol-gel method.<sup>1</sup> 1 ml (0.17 mol) Titanium isopropoxide was slowly dropwise added to a beaker containing 20 ml of Ethanol and water (3:1) under vigorous stirring. The stirring was done for 2 h then the white precipitate was centrifuged and washed 2-3 times. The TiO<sub>2</sub> nanoparticles was then dry overnight under vacuum and heated at 550°C for 1 h.

***N-doped and Co/N co-doped TiO<sub>2</sub>:*** The N-doped and Co/N co-doped TiO<sub>2</sub> synthesis combined the sol-gel and precipitation methods along with the N precursor as thiourea (0.5 mol for NTO-1 to 1.5mol for NTO-4) and Co precursor cobalt acetate tetrahydrate (0.05 mol-0.15 mol) previously dissolved in the 20 ml of Ethanol and water (3:1). Following the same washing and heating process as TiO<sub>2</sub>, NTO and CoNTO samples were prepared by varying the thiourea 0.1-0.3 M and cobalt acetate tetrahydrate 0.05-1.5 M.

**Computational Details:** DFT calculations have been carried out using the CASTEP code. Band structure and DOS plots were carried out using a 9x9x3 Monkhorst pack scheme k point grid using GGA exchange-correlation with PBE functional using Norm Conserving Pseudopotentials, Koelling-Hammon relativistic treatment with plane-wave basis set cutoff set to 1350 eV and SCF cutoff set at 1e<sup>-7</sup> eV.<sup>2-5</sup> Spin-orbit coupling was included in the calculations. Pulay Density mixing scheme was used as an electronic minimizer. PBE+D2 correction using Grimme parameters to take into account vdW interactions were included.<sup>6</sup> According to previous reports,<sup>[5]</sup> slab models were constructed with a 30 Å vacuum layer to prevent interlayer interaction with a 5x5x1 k point grid and all other parameters remaining the same. Geometry optimization was carried out using the BFGS algorithm with maximum energy cutoff set at 1e<sup>-7</sup> eV, maximum force, maximum stress, and maximum displacement set at 0.01 eV/Å, 0.03 Gpa, and 0.001 Å, respectively. Spin orbital coupling was included in geometry optimization as well. According to previous reports, a Brillouin Zone path of  $\Gamma \rightarrow M \rightarrow K \rightarrow \Gamma \rightarrow K'$  was used.<sup>7</sup>

**PEC characterization:** The final PEC devices were characterized using an electrochemical workstation (Bio-Logic Science Instruments, Model SP-300) in a typical three-electrode configuration with Pt as counter electrode and saturated calomel electrode (SCE) as a reference in the 1M NaOH electrolyte, and the illumination source was a 100 W AM 1.5G solar simulator (PECCEL, Japan, Model: L-01). The three electrodes PEC device and EIS measurements were performed in three-neck glass cells with FTO/TiO<sub>2-x</sub>, FTO/NTO and FTO/CoNTO as a working electrode, Pt as a counter electrode, and Hg/HgO electrode as a reference electrode. 1 M NaOH electrolyte was used for all PEC characterization. The quantities of evolved gases were measured by Gas chromatography (GC) analysis by an online GC analyzer (Model. TRACE 1300, Thermo Fisher)

**Material Characterization.** Morphological characterization *via* FESEM micrograph was recorded by JEOL JSM 7500F. Elemental analysis *via* EDX was recorded using Oxford Instruments X-Max with INCA software coupled to the FESEM. TEM and HAADF-STEM images with elemental mapping were recorded with JEOL, JEM-2100F coupled with EDX setup, and 200 kV electron source. The XRD measurements were carried out with a Rigaku (Mini Flex II, Japan) powder X-ray diffractometer having Cu K $\alpha$  = 1.54059 Å radiation. Raman spectra were recorded using Horiba T64000 Raman spectrometer with 532 nm laser excitation at 2 mW/cm<sup>2</sup> intensity. XPS spectra were recorded using an Omicron Nanotechnology XPS with a hemispherical analyser and a multichannel detector. UV-vis-NIR absorption spectra were recorded on a Varian Cary 5000 UV-vis-NIR spectrophotometer (175-3300 nm range). MPMS characterization was carried out using the Quantum Design MPMS XL system. The fluorescence lifetimes were recorded by using a time-correlated single-photon counting spectrofluorometer from HORIBA Jobin Yvon IBH. The fluorescence lifetime was calculated by fitting the decay curves by using a program installed by IBH. Circular Dichroism (CD) measurement was carried out using JASCO J-815 spectropolarimeter. CPL measurement was carried out using JASCO CPL-300 Spectrometer.

**Table S1:**

| Material name      | Lattice parameter (a) (Å) | Lattice parameter (b) (Å) | Lattice parameter (c) (Å) | Unit cell volume (Å <sup>3</sup> ) |
|--------------------|---------------------------|---------------------------|---------------------------|------------------------------------|
| TiO <sub>2-x</sub> | 3.7886                    | 3.7886                    | 9.5230                    | 136.71                             |
| NTO-3              | 3.7966                    | 3.7966                    | 9.4990                    | 136.92                             |
| CoNTO-2            | 3.7935                    | 3.7935                    | 9.5086                    | 136.83                             |

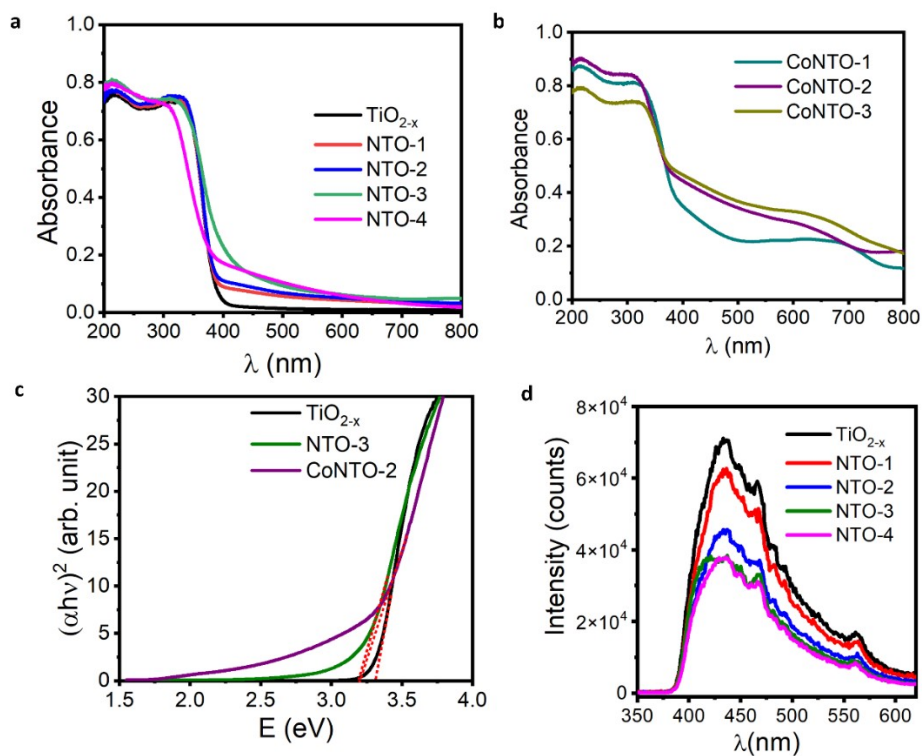

**Fig. S1.** a) UV-Vis absorption spectra of TiO<sub>2-x</sub> and various nitrogen-doped TiO<sub>2</sub> (NTO) samples, demonstrating the impact of nitrogen incorporation on optical absorption. b) UV-Vis absorption spectra of CoNTO and various Co doped in NTO-3. c) Tauc plot for TiO<sub>2-x</sub>, NTO-3 and CoNTO-2. d) Photoluminescence (PL) spectra of different NTO samples, highlighting variations in charge carrier recombination dynamics.

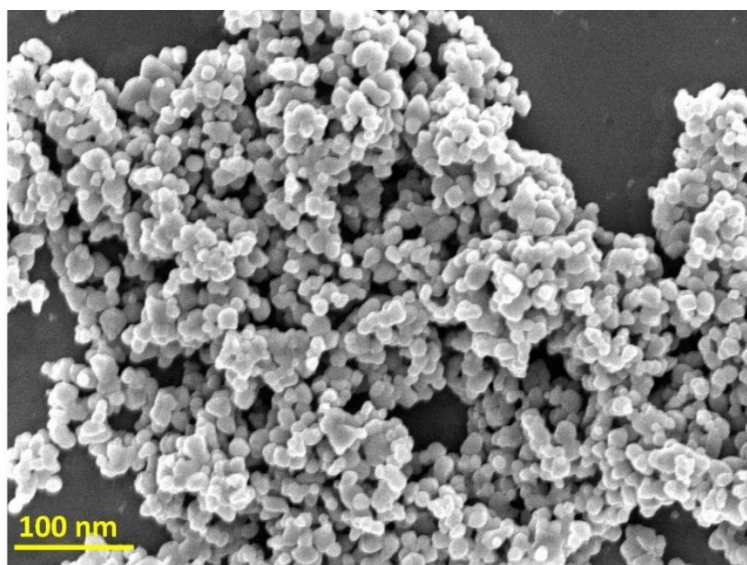

**Fig. S2.** Scanning electron microscopy (SEM) image of CoNTO-2, illustrating the surface morphology and structural features of the co-doped sample.

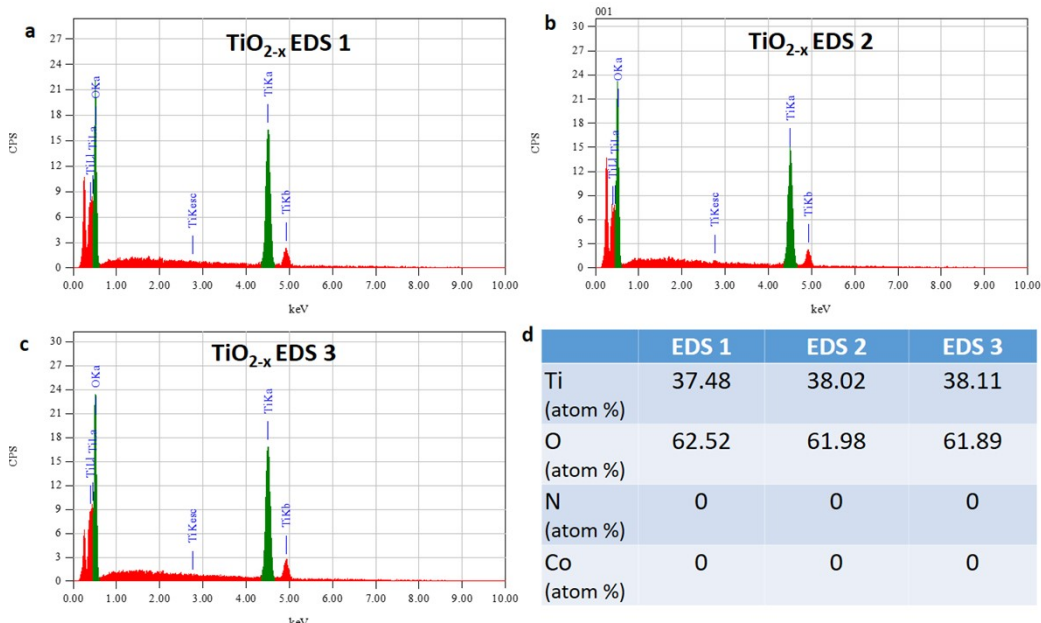

**Fig. S3.** a-c) Energy-dispersive X-ray spectroscopy (EDS) spectra of  $\text{TiO}_{2-x}$  obtained from repeated measurements, confirming elemental composition. d) Elemental analysis data derived from SEM-EDS, providing a quantitative assessment of  $\text{TiO}_{2-x}$ .

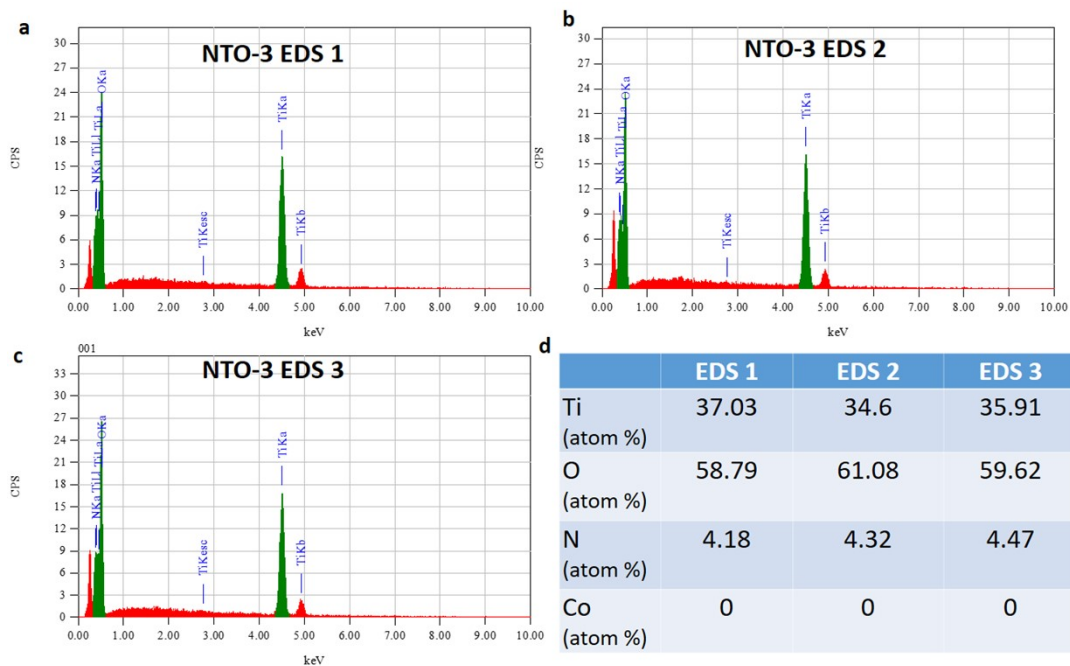

**Fig. S4.** a-c) Repeated EDS spectra taken from identical samples of NTO-3, verifying the elemental distribution and doping consistency. d) SEM-EDS-based elemental analysis data of NTO-3, ensuring accurate compositional characterization.

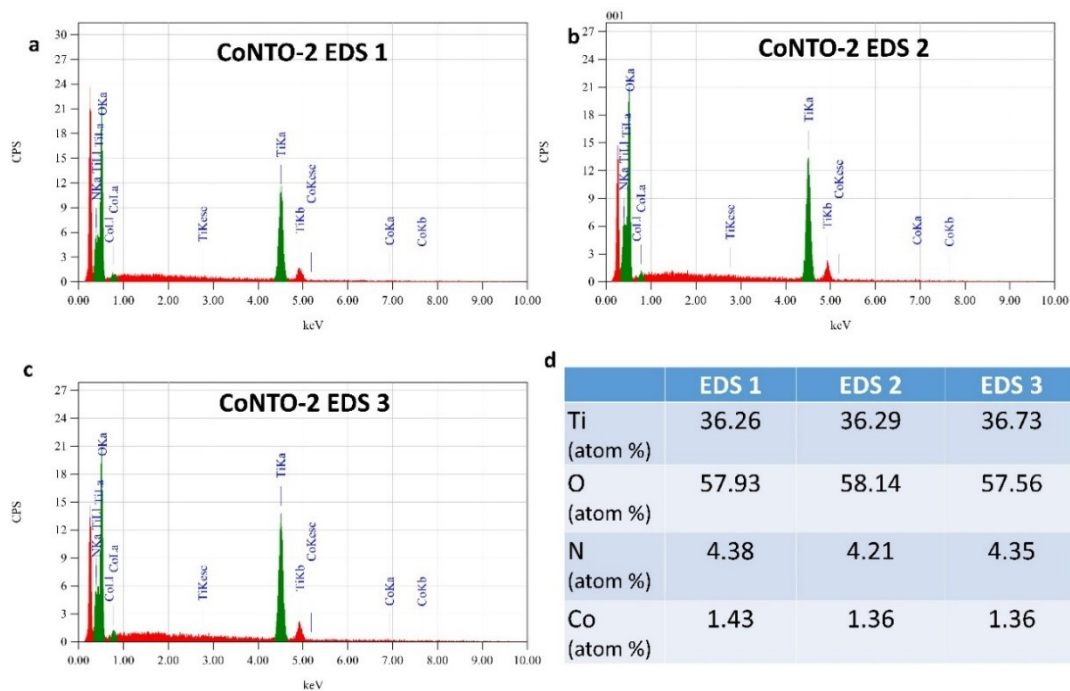

**Fig. S5.** a–c) Repeated EDS spectra taken from identical samples of CoNTO-2, validating the uniform incorporation of Co and N into the  $\text{TiO}_2$  lattice. d) Elemental analysis data from SEM-EDS, confirming the stoichiometry of CoNTO-2.

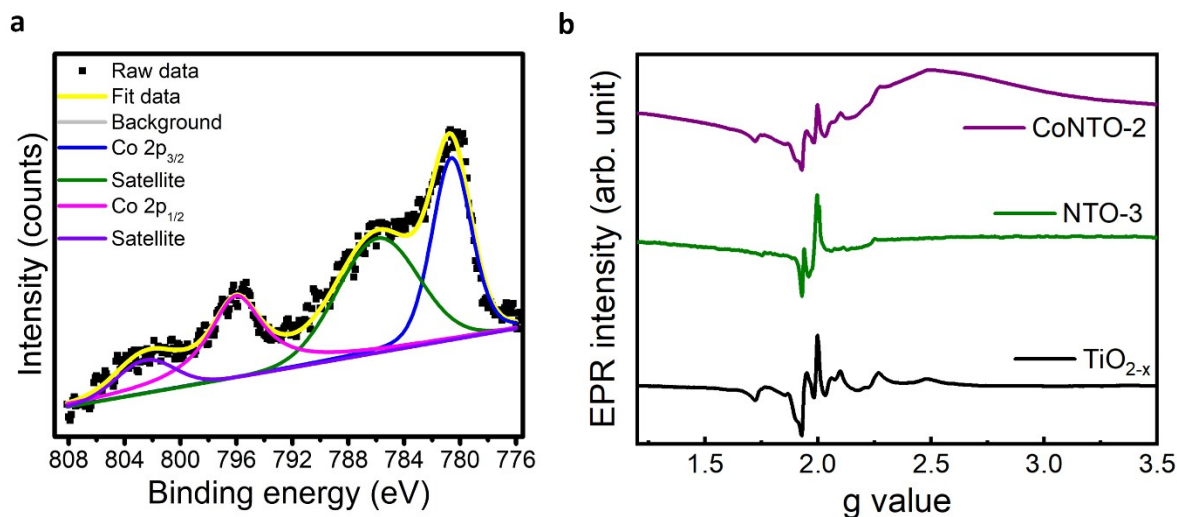

**Fig. S6.** a) X-ray photoelectron spectroscopy (XPS) spectra of the deconvoluted  $\text{Co}^{2+}$  peak in CoNTO-2, providing insights into the oxidation state and electronic environment of Co dopants. b) EPR spectra for representative  $\text{TiO}_{2-x}$ , NTO-3 and CoNTO-2.

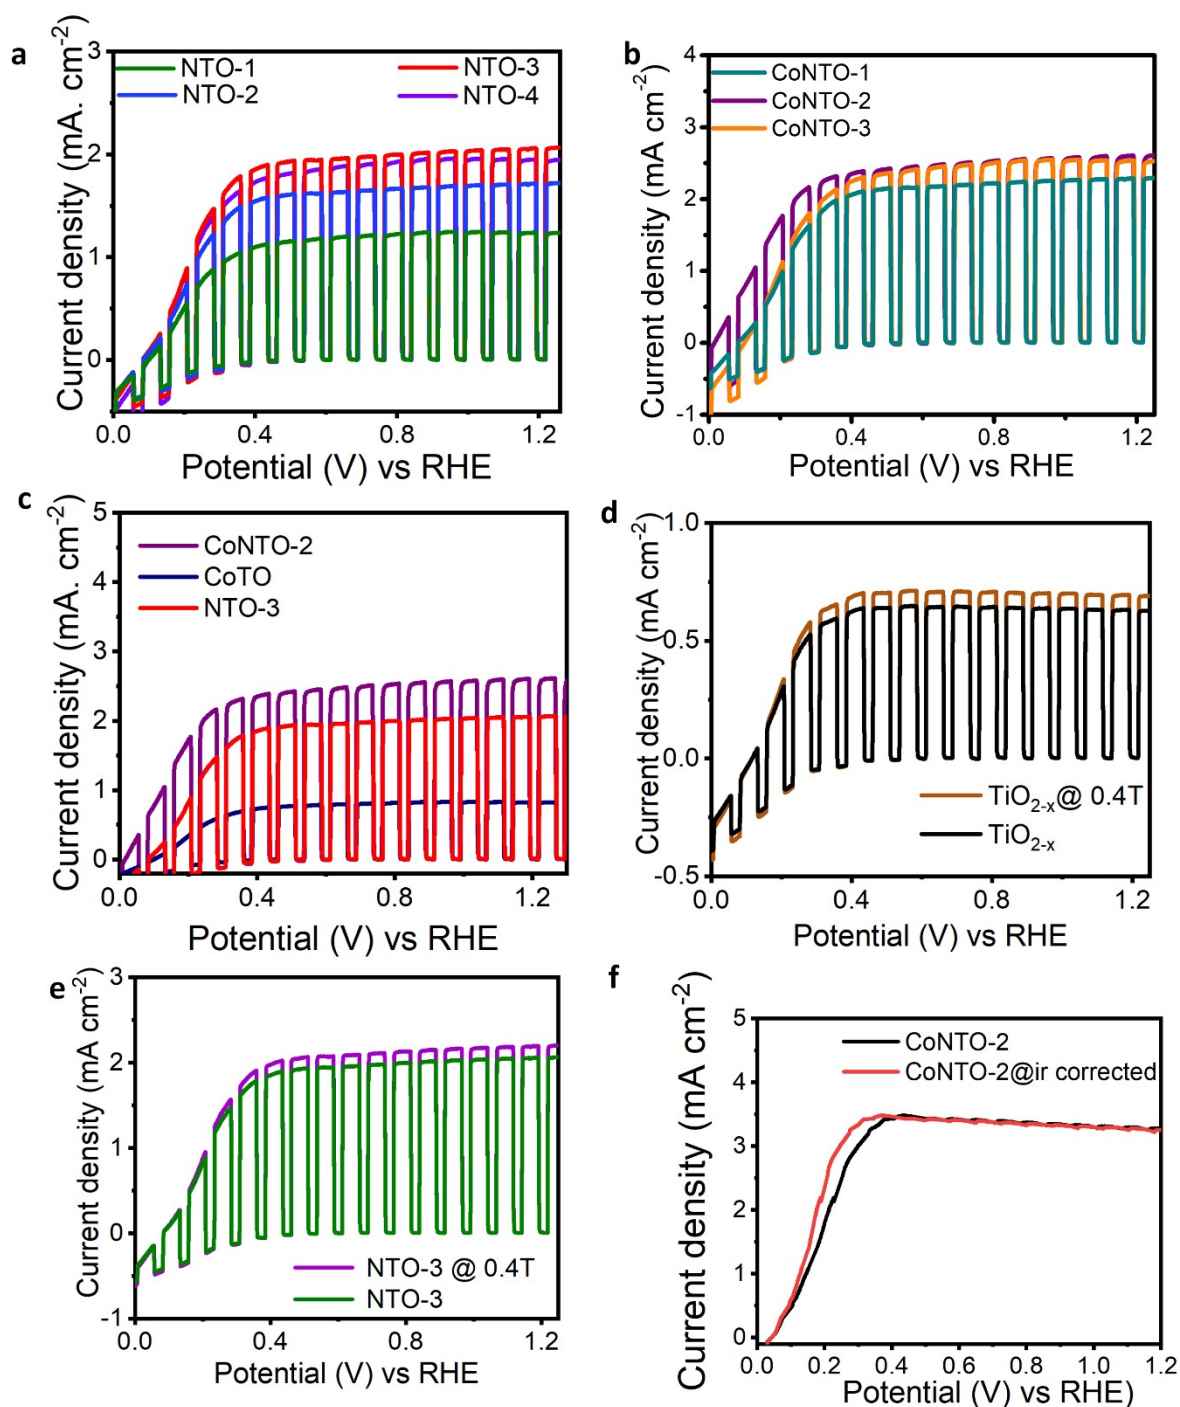

**Fig. S7.** Chopped LSV for a) NTO and b) CoNTO. c) Chopped LSV for CoTO with NTO-3 and CoTO-2. Chopped LSV under 0.4T magnetic field for d) TiO<sub>2-x</sub> and a representative e) NTO-3 sample. f) iR corrected LSV for CoNTO-2 at 0.4T applied magnetic field.

**Supplementary Note 1:** The effect of magnetic field of TiO<sub>2-x</sub> shows slight enhancement in the photocurrent density (Fig. S7c) which signifies the spin polarization in pristine TiO<sub>2-x</sub>. The representative NTO-3 (Fig. S7d) sample also shows slight enhancement with the magnetic field and this signifies the need of Co doping further.

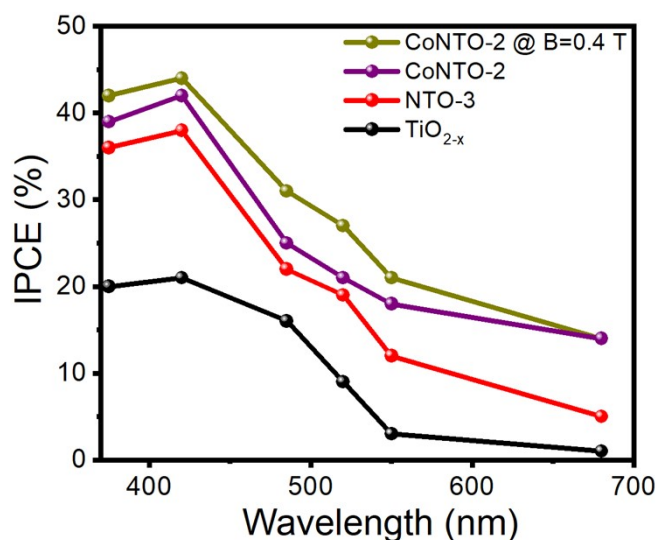

**Fig. S8.** Incident photon-to-current efficiency (IPCE) spectra of  $\text{TiO}_{2-x}$ , NTO-3, and CoNTO-2 ( $H = 0$  and  $0.4$  T), demonstrating enhanced photoresponse due to co-doping and magnetic field effects.

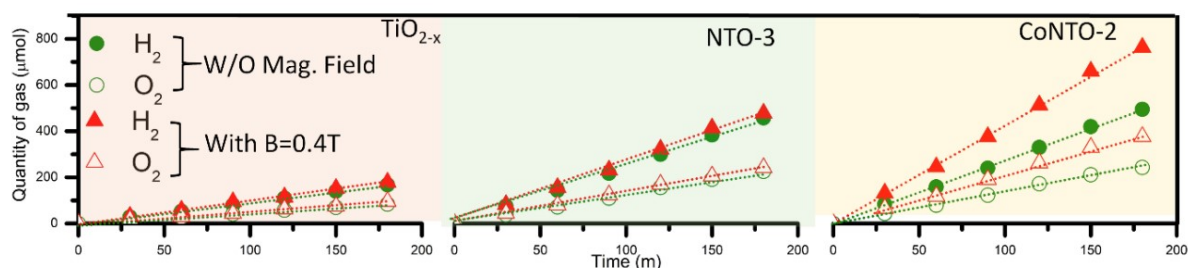

**Fig. S9.** Gas chromatography (GC) data of three different anode samples, illustrating variations in gas evolution and Faradaic efficiency.

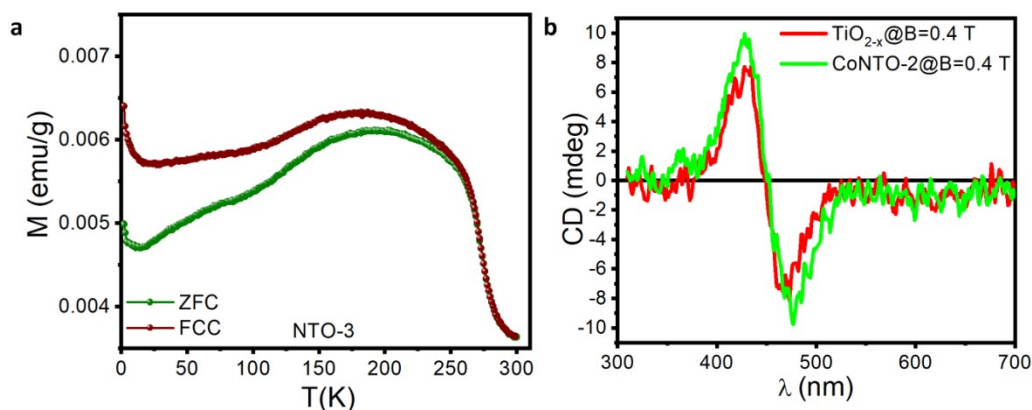

**Fig. S10.** a) Magnetization vs. temperature ( $M$ - $T$ ) plot of NTO (3) measured at  $500$  Oe, assessing the magnetic behavior of nitrogen-doped  $\text{TiO}_{2-x}$ . b) Circular dichroism (CD) spectra of  $\text{TiO}_{2-x}$  and CoNTO-2 under an applied magnetic field, providing evidence of magneto-chiral optical activity.

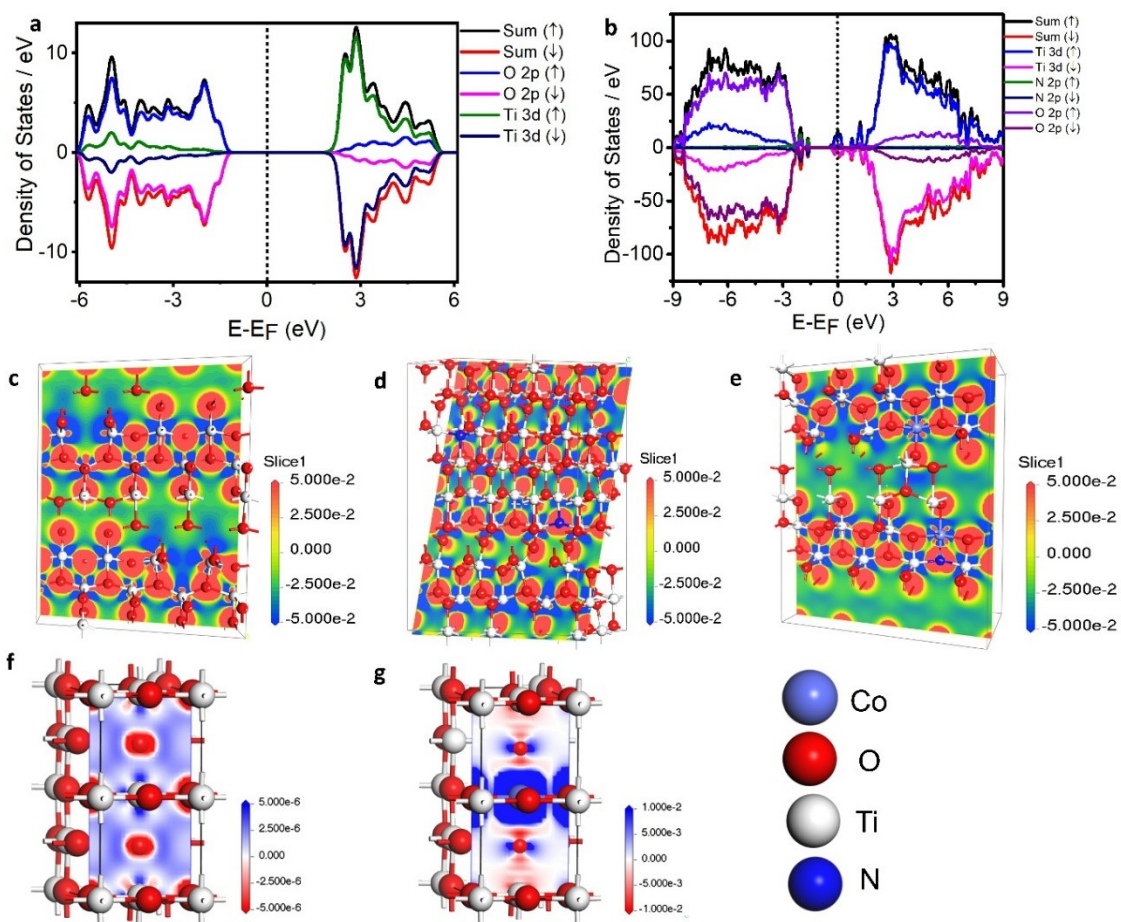

**Fig. S11.** a) Partial density of states (PDOS) plot of pristine  $\text{TiO}_{2-x}$ , demonstrating the absence of spin polarization. b) PDOS plot of NTO, revealing minor spin asymmetry due to nitrogen doping. c–e) Hirshfeld charge analysis of c)  $\text{TiO}_{2-x}$ , d) NTO, and e) CoNTO-2, elucidating charge distribution and electron density at active sites, correlating with catalytic activity. Spin density contour map of (f)  $\text{TiO}_{2-x}$ , and (g) CoNTO-2

## References

1. A. E. Mragui, O. Zegaoui, I. Daou, J. C. G. Esteves da Silva, Synthesis of Fe- and Co-Doped TiO<sub>2</sub> with Improved Photocatalytic Activity Under Visible Irradiation Toward Carbamazepine Degradation. *Materials* 2019, **12**, 3874.
2. P. Šč̣ajev, K. Jarašiūnas, S. Okur, Ü. Özgür, H. Morkoç, Carrier dynamics in bulk GaN. *J. Appl. Phys.* 2012, **111**, 023702.
3. T. Shamirzaev, D. Yakovlev, A. Bakarov, N. Kopteva, D. Kudlacik, A. Gutakovskii, M. Bayer, Recombination and spin dynamics of excitons in thin (Ga,Al)(Sb,As)/AlAs quantum wells with an indirect band gap and type-I band alignment. *Phys. Rev. B* 2020, **102**, 165423.
4. S. Zaheer, S. M. Young, D. Cellucci, J. C. Teo, C. L. Kane, E. J. Mele, A. M. Rappe, Spin Texture on the Fermi Surface of Tensile-strained HgTe. *Phys. Rev. B* 2013, **87**, 045202.
5. W. Zhou, J. Chen, Z. Yang, J. Liu, F. Ouyang, Geometry and electronic structure of monolayer, bilayer, and multilayer Janus WSSe. *Phys. Rev. B* 2019, **99**, 075160.
6. W. Zhou, Z. Yang, A. Li, M. Long, F. Ouyang, Spin and valley splittings in Janus monolayer WSSe on a MnO(111) surface: Large effective Zeeman field and opening of a helical gap. *Phys. Rev. B* 2020, **101**, 045113.
7. J. Qi, X. Li, Q. Niu, J. Feng, Giant and tunable valley degeneracy splitting in MoTe<sub>2</sub>. *Phys. Rev. B* 2015, **92**, 121403.
